# Supplementary material
Source: MDPI journal article supplement (https://www.mdpi.com/2073-4441/12/5/1259)
Supplement: s1 [file s1]

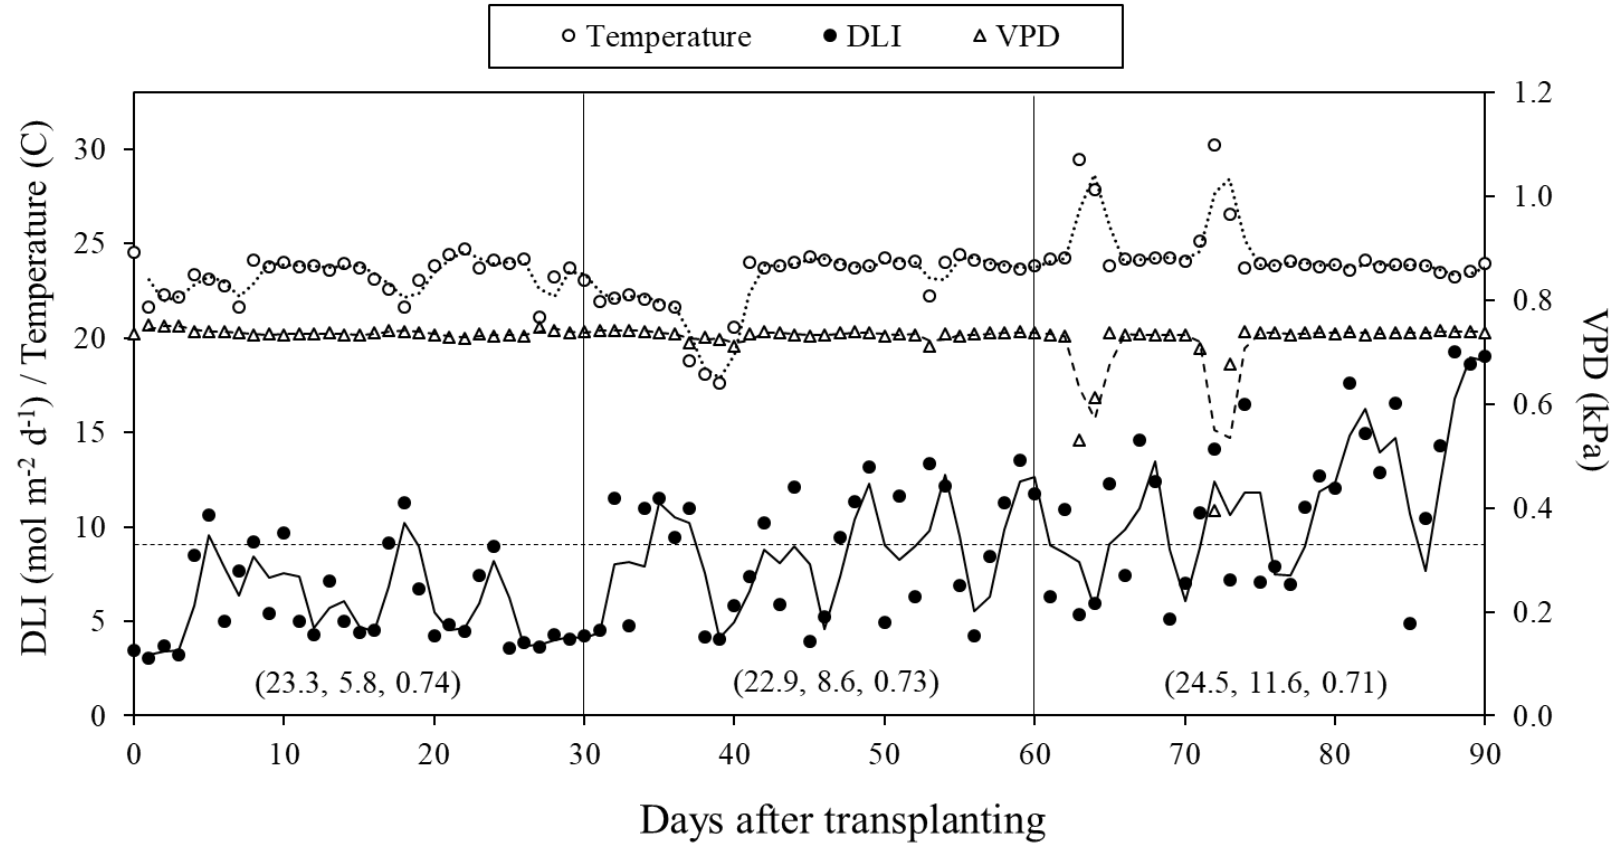

**Figure S1.** Ambient temperature, daily light integral (DLI), and vapor pressure deficit (VPD) collected in the greenhouse during the experimental period (December through February). The parameters were averaged over the day. A dotted line is the average DLI during entire production period ( $8.9 \text{ mol m}^{-2} \text{d}^{-1}$ ).
